# Supplementary material for: Charge Injection, Carriers Recombination and HOMO Energy Level Relationship in Perovskite Solar Cells
Source: PubMed Central journal article supplement (PMC5522453; doi:10.1038/s41598-017-06245-5), 2017-07-21
Supplement: 41598_2017_6245_MOESM1_ESM.pdf [file 41598_2017_6245_MOESM1_ESM.pdf]

# Charge Injection, Carriers Recombination and HOMO Energy Level Relationship in Perovskite Solar Cells.

## (Supporting Information)

Jesús Jiménez-López<sup>1</sup>, Werther Cambarau<sup>1</sup>, Lydia Cabau<sup>1</sup>, Emilio Palomares<sup>\*,1,2</sup>

<sup>1</sup>Institute of Chemical Research of Catalonia (ICIQ), Barcelona Institute of Science and Technology, Avda. Països Catalans, 16, E-43007, Tarragona, Spain

<sup>2</sup>ICREA, Passeig Lluís Companys, 28, E-08018, Barcelona, Spain

\*epalomares@iciq.es

### Device Characterization

#### *J-V curves*

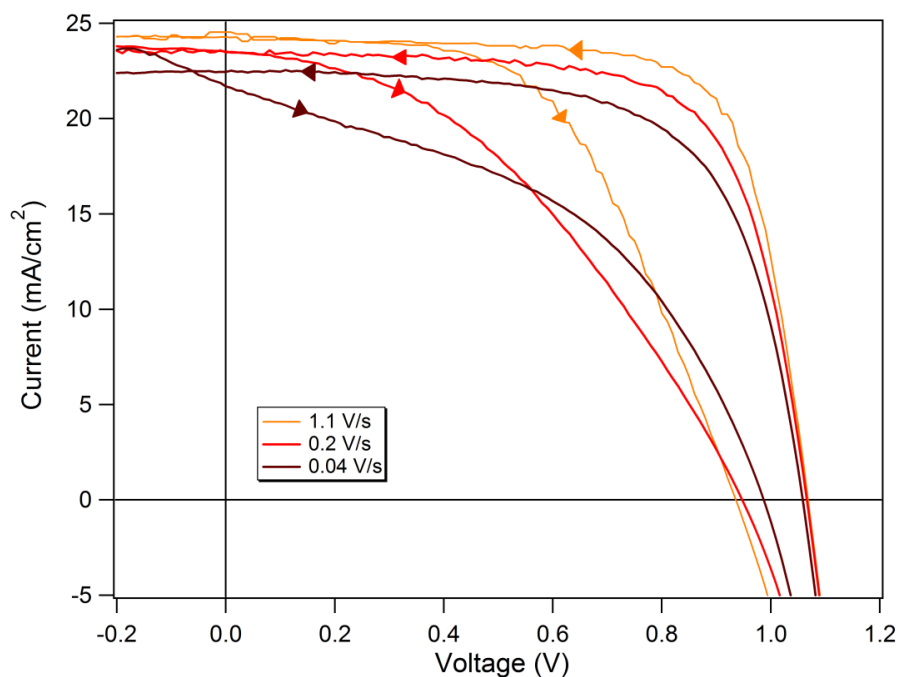

**Figure S1.** Forward and reverse scan J-V characteristics acquired at different scan rates for the spiro-OMeTAD based solar cells.

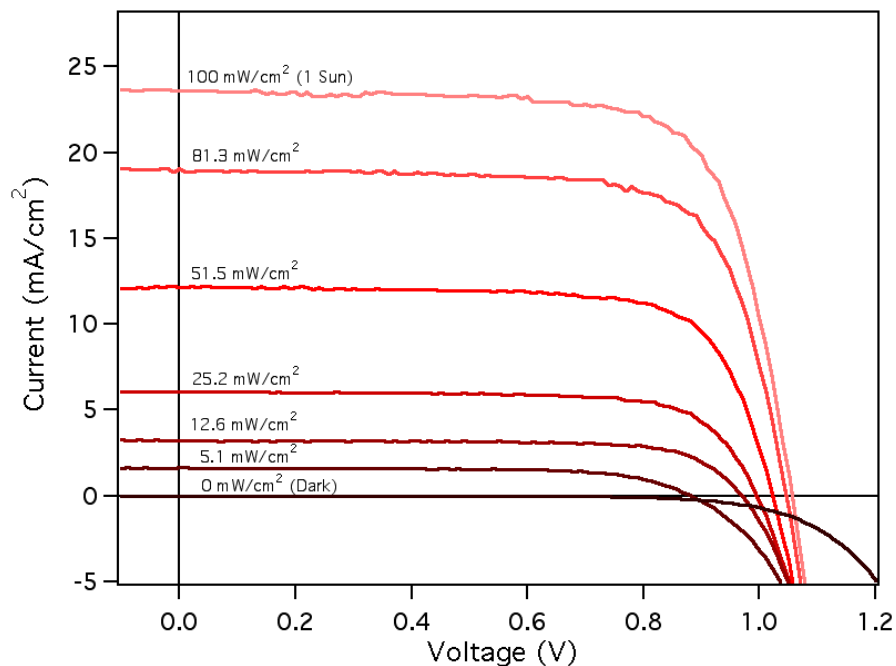

**Figure S2.** J-V characteristics measured in reverse scan at different light intensities (using appropriate neutral density filters) for the device FTO/TiO<sub>2</sub>/MAPI/spiro-OMeTAD/Au.

***V<sub>oc</sub> vs time***

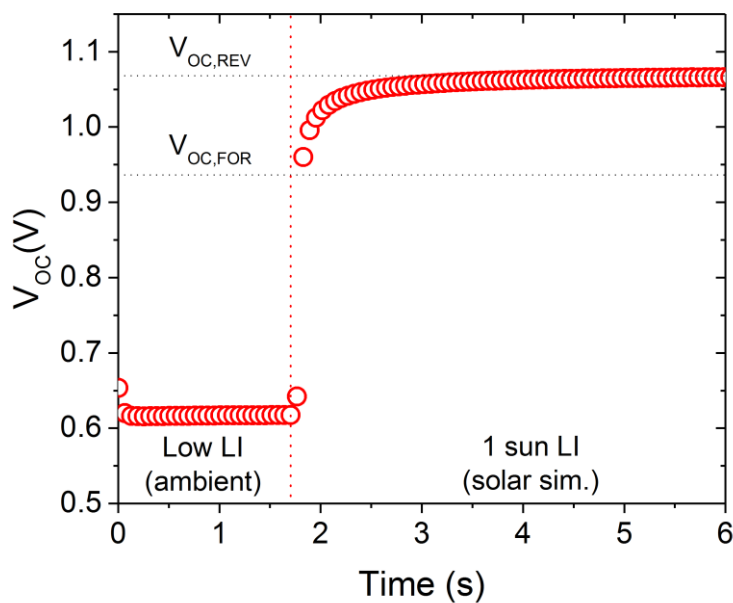

**Figure S3.** Stabilization time of  $V_{oc}$  for the spiro-OMeTAD based cell (see Table 1 of the manuscript). The cell is kept at low LI (ambient light) until the solar simulator is switched on and a 1 sun LI is applied.

## Photoluminescence

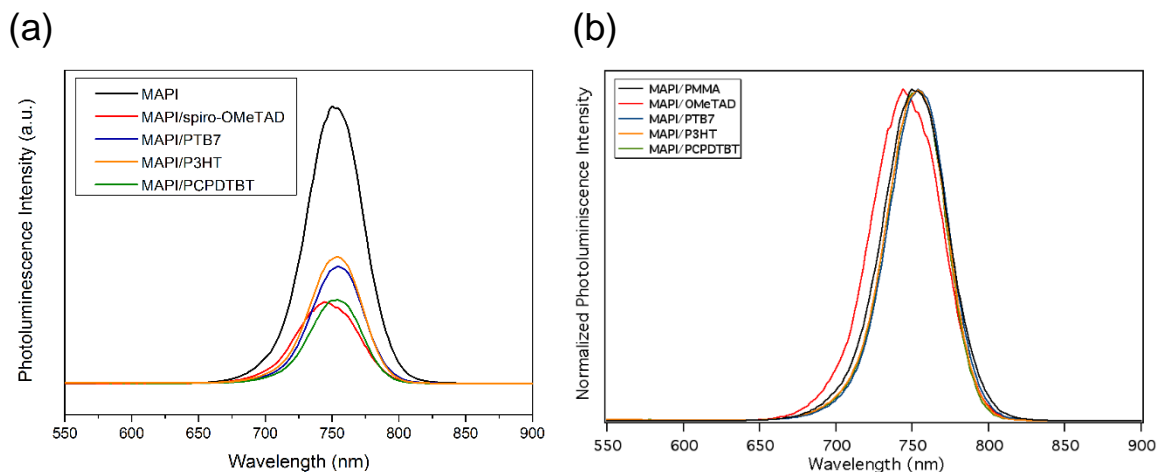

**Figure S4.** Photoluminescence spectra of the different films prepared with the HTM on top of the perovskite: (a) absolute values; (b) normalized values. Analyzing the decay focus on the emission peak, the TCSPC was calculated.

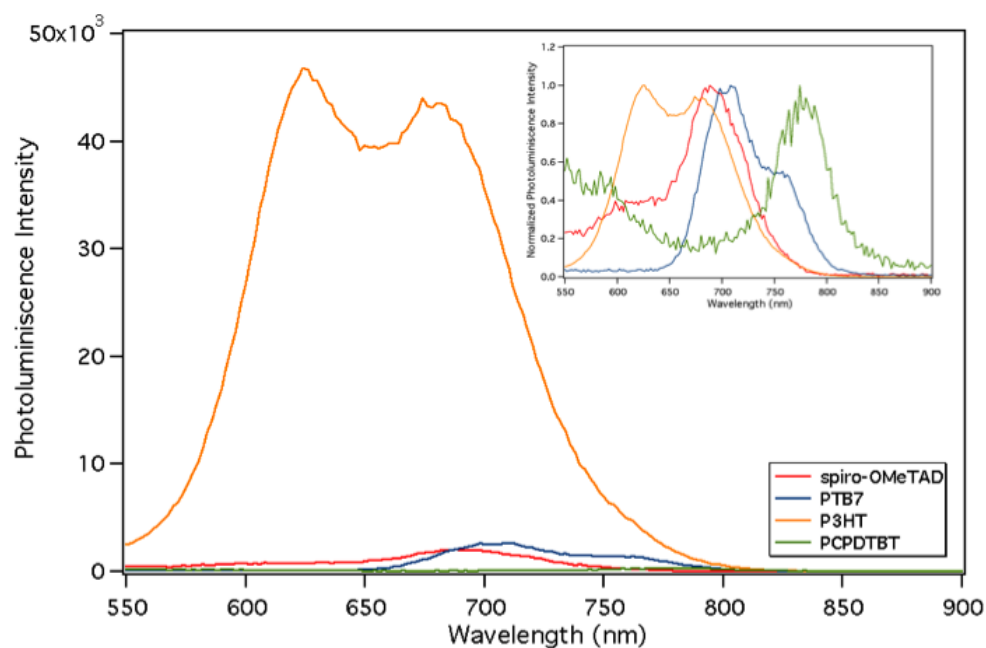

**Figure S5.** Photoluminescence spectra of the different HTM employed in this study. The inset shows the normalized spectra.

*Photoinduced transient measurements*

| HTM          | Sweep   | V <sub>oc</sub> (mV) | J <sub>sc</sub> (mA/cm <sup>2</sup> ) | FF (%) | PCE (%) |
|--------------|---------|----------------------|---------------------------------------|--------|---------|
| Spiro-OMeTAD | forward | 936                  | 24.4                                  | 55.1   | 12.6    |
|              | reverse | 1068                 | 24.3                                  | 73.6   | 19.1    |
| PTB7         | forward | 904                  | 19.8                                  | 44.0   | 7.9     |
|              | reverse | 947                  | 19.6                                  | 63.2   | 11.7    |
| P3HT         | forward | 797                  | 16.3                                  | 33.3   | 4.3     |
|              | reverse | 877                  | 18.8                                  | 65.9   | 10.9    |
| PCPDTBT      | forward | 853                  | 13.4                                  | 42.8   | 4.9     |
|              | reverse | 911                  | 14.6                                  | 56.0   | 7.4     |

**Table ST1.** Photovoltaic parameters of the devices studied with photoinduced time resolved techniques.

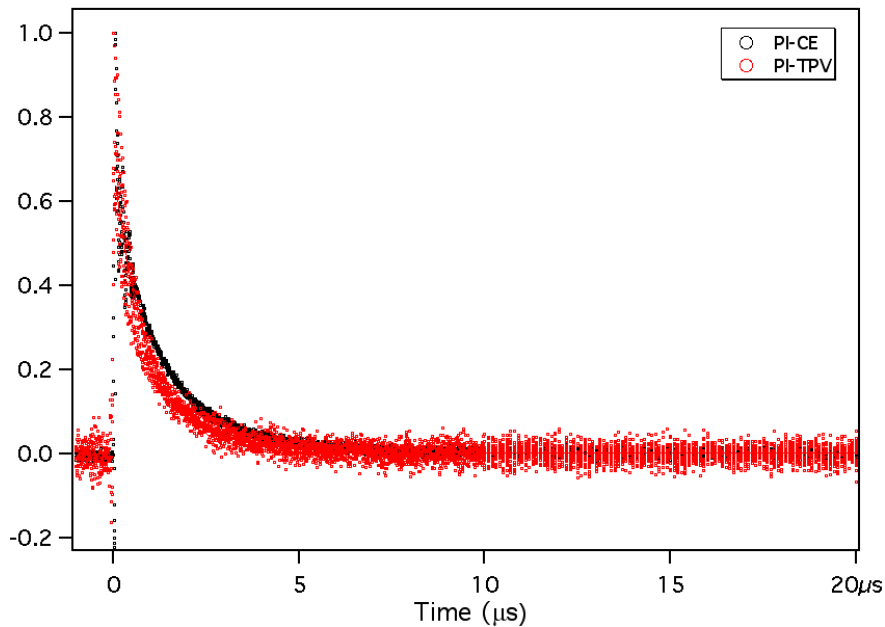

**Figure S6.** Normalized decays of PICE vs PI-TPV at 1 sun LI background.

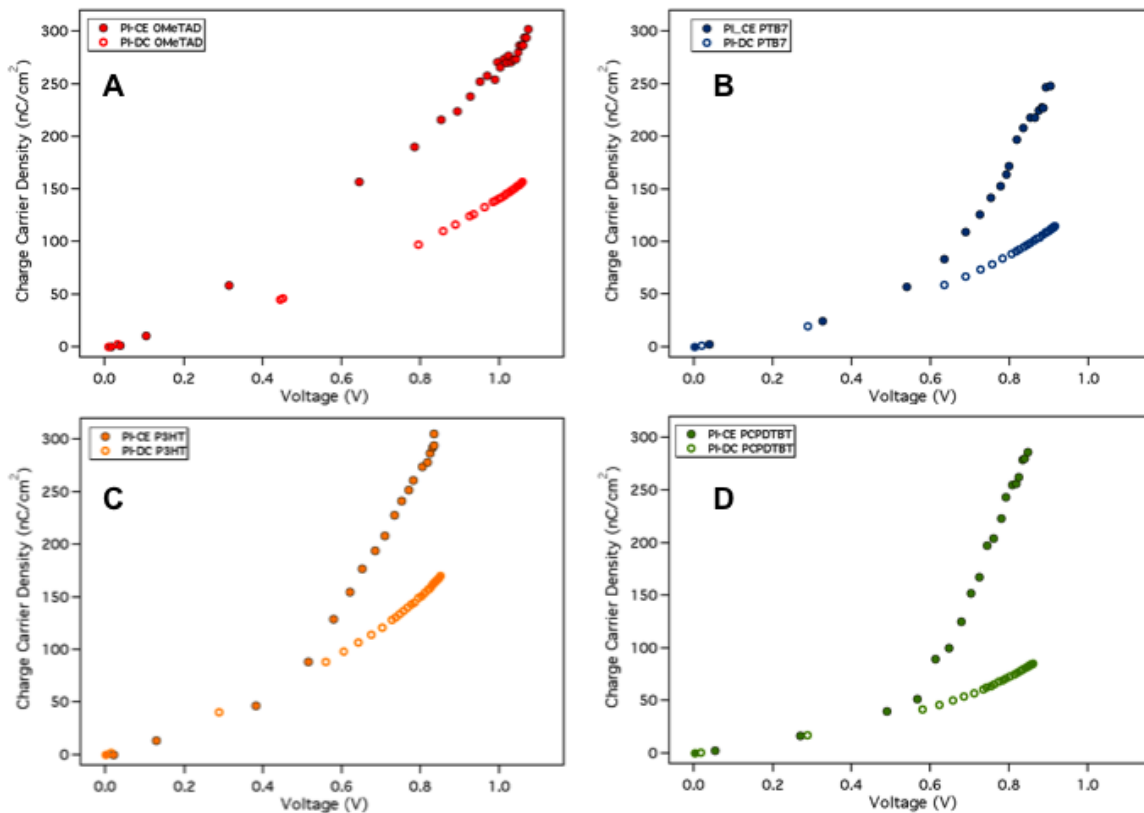

**Figure S7.** Comparison between all the different HTM based cells in terms of extracted charge obtained with PICE (solid symbols) or PIDC (void symbols).

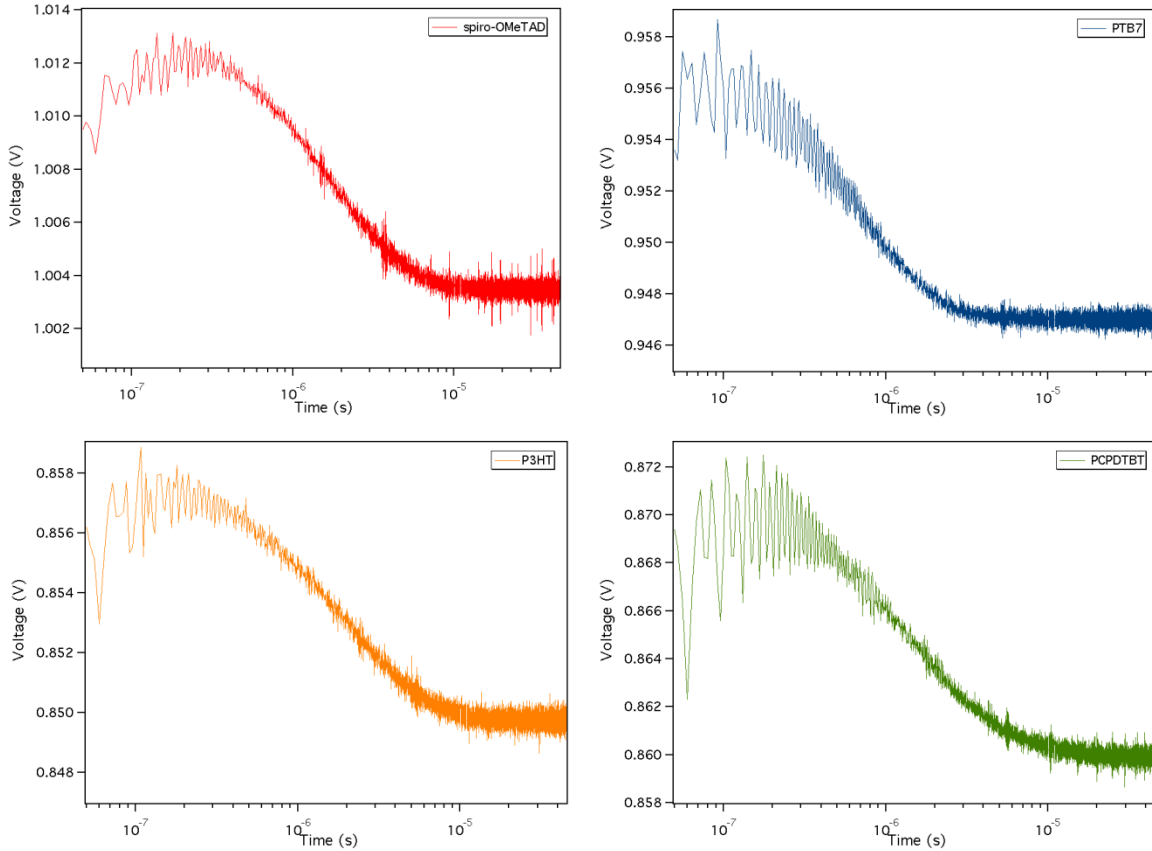

**Figure S8.** PI-TPV decays for each HTM based cell at 1 sun LI background.

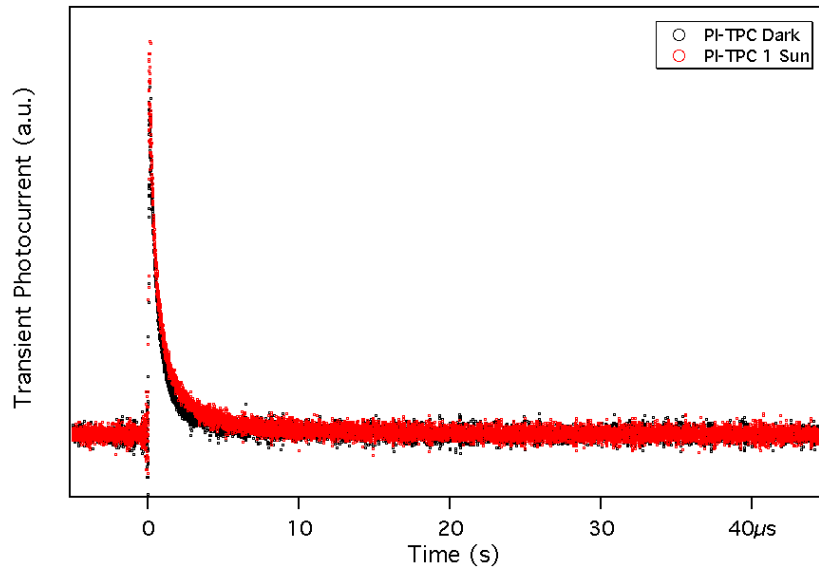

**Figure S9.** PI-TPC decays at 1 sun and dark background LI for a spiro-OMeTAD based cell. The values are corrected for the respective baselines and are not normalized.

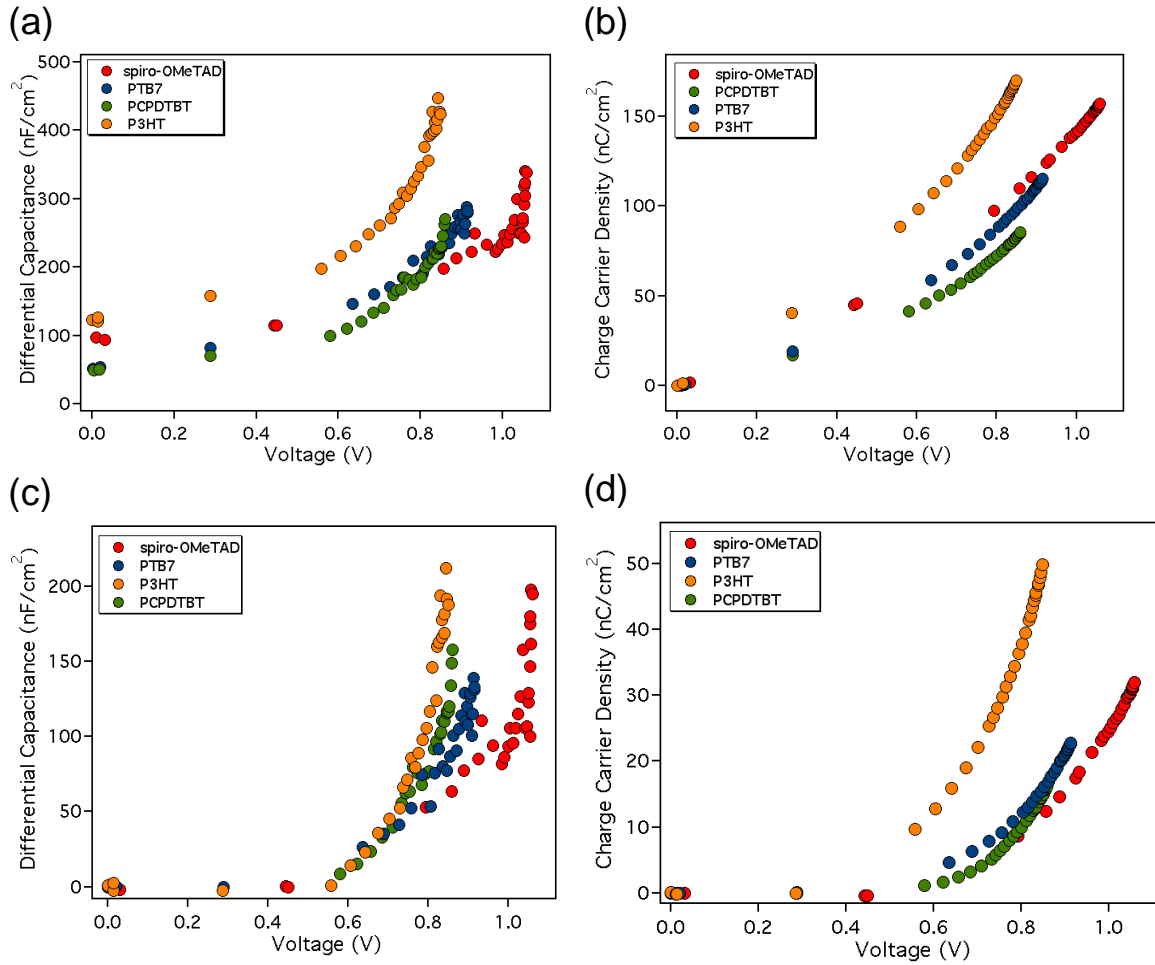

**Figure S10.** Differential capacitance (a, c) and charge density (b, d) versus voltage obtained with PIDC without subtracting the geometric capacitance (a, b) and subtracting the geometric capacitance (c, d).

| HTM          | Charge meas. type | Q (nC/cm <sup>2</sup> ) | $\tau$ PI-TPV ( $\mu$ s) | OF  | J <sub>rec</sub> (mA/cm <sup>2</sup> ) | J <sub>sc</sub> (mA/cm <sup>2</sup> ) |
|--------------|-------------------|-------------------------|--------------------------|-----|----------------------------------------|---------------------------------------|
| Spiro-OMeTAD | PICE              | 302                     | 0.98                     | 9.0 | 34.4                                   | 24.3                                  |
|              | PIDC              | 157                     |                          | 6.4 | 25.0                                   |                                       |
| PTB7         | PICE              | 248                     | 0.92                     | 5.2 | 51.4                                   | 19.6                                  |
|              | PIDC              | 115                     |                          | 4.7 | 26.6                                   |                                       |
| P3HT         | PICE              | 329                     | 2.40                     | 6.3 | 21.9                                   | 18.8                                  |
|              | PIDC              | 170                     |                          | 3.8 | 18.6                                   |                                       |
| PCPDTBT      | PICE              | 286                     | 2.20                     | 3.4 | 37.7                                   | 14.6                                  |
|              | PIDC              | 85                      |                          | 3.3 | 11.7                                   |                                       |

**Table ST2.** Summary of charge density, PI-TPV lifetime at 1 sun LI and calculated recombination current at V<sub>oc</sub> according to Equation 5 of the manuscript. The J<sub>sc</sub> is the experimental value obtained from J-V graphs in reverse sweep.
